# Supplementary material for: The capillary interaction between pairs of granular rafts
Source: Royal Society of Chemistry journal article supplement (doi:10.1039/c9sm00476a), 2019-01-01
Supplement: c9sm00476a1.pdf [file c9sm00476a1.pdf]

## Supplementary information

May 7, 2019

### Supplementary Video 1

Side view of the motion of two granular rafts at an oil-water interface. Both rafts are formed by the aggregation of respectively 50 and 30 particles ZrO beads (density  $\rho_s = 3,800 \text{ kg.m}^{-3}$ , radius  $R_{part} = 0.45 \text{ mm}$ ). The movie is played at real speed.

### Supplementary Video 2

Top view of the motion of two granular rafts at an oil-water interface. Both rafts are formed by the aggregation of respectively 50 and 30 particles ZrO beads (density  $\rho_s = 3,800 \text{ kg.m}^{-3}$ , radius  $R_{part} = 0.45 \text{ mm}$ ). The movie is played at real speed.

# Theoretical description of the raft deformation

Here, we propose a minimal model to bring a theoretical foundation to the experimental result described in the previous section. To account for the vertical force the raft is imposing on the interface, we distribute  $F_{vert}$  along the perimeter of the raft, through the introduction of the pressure  $P$  at the point  $\vec{r}$

$$P(\vec{r}) = \frac{F_{vert}}{2\pi R_{raft}} \delta(\|\vec{r}\| - R_{raft}) \quad (1)$$

where  $\delta$  is a Dirac function. We then calculate the pressure jump at the oil-water interface, for  $\|\vec{r}\| \geq R_{raft}$ , in the limit of small deformations. The classic differential equation that describes the height of the interface  $h$  is modified by the presence of  $P$ :

$$\left(\nabla^2 - \frac{1}{\ell_c^2}\right) h = \frac{P(\vec{r})}{\gamma}. \quad (2)$$

The solution of equation (2) is given by the convolution of  $P$  and the green function  $G(\vec{r}, \vec{s}) = -\frac{1}{2\pi} K_0\left(\frac{\|\vec{r}-\vec{s}\|}{\ell_c}\right)$ , associated with the linear operator  $(\nabla^2 - 1/\ell_c^2)$ .  $K_0$  is the modified Bessel function of the second kind of order zero.

$$h(\vec{r}) = \int_{\mathbb{R}^2} G(\vec{r}, \vec{s}) \frac{P(\vec{s})}{\gamma} ds ds\theta \quad (3)$$

$$h(\vec{r}) = -\frac{F_{vert}}{4\pi^2\gamma} \int_0^{2\pi} K_0\left(\frac{\sqrt{\|\vec{r}\|^2 + R_{raft}^2 - 2R_{raft}\|\vec{r}\|\cos(\theta)}}{\ell_c}\right) d\theta. \quad (4)$$

Because we are only interested in the depth of the interface at the edge of the raft, we apply the previous equation for  $\|\vec{r}\| = R_{raft}$ :

$$h_{raft} = \frac{F_{vert}}{\pi^2\gamma} \int_0^{\pi/2} K_0\left(\frac{2R_{raft}}{\ell_c} \sin(\theta)\right) d\theta. \quad (5)$$

In the limit  $R_{raft} \ll \ell_c$ , we can go further with the calculation, using  $K_0(x) \underset{x \rightarrow 0}{\sim} -\ln(x)$ :

$$h_{raft} \sim -\frac{F_{vert}}{\pi^2\gamma} \int_0^{\pi/2} \ln\left(\frac{2R_{raft}}{\ell_c} \sin(\theta)\right) d\theta \quad (6)$$

$$h_{raft} \sim -\frac{F_{vert}}{2\pi\gamma} \ln\left(\frac{R_{raft}}{\ell_c}\right). \quad (7)$$

Our minimal model thus gives the following result (in the limit of small deformations and small granular rafts):

$$-\frac{h_{raft}/\ell_c}{\ln(R_{raft}/\ell_c)} \sim \frac{F_{vert}}{2\pi\gamma\ell_c} \propto n, \quad (8)$$

which corresponds to the previous experimental and numerical results observed in the same limits. All these results validate that:

$$F_{cap\ B \rightarrow A} = n_A n_B F_{cap\ 1 \rightarrow 1}. \quad (9)$$
